# Supplementary material for: Activation of molecular oxygen and its use in stereoselective tetrahydrofuran-syntheses from δ,ε-unsaturated alcohols
Source: Royal Society of Chemistry journal article supplement (doi:10.1039/b804588g), 2008-01-01
Supplement: b804588g.pdf [file b804588g.pdf]

*Electronic Supporting Information for:*

Activation of Molecular Oxygen and its Use in Stereoselective  
Tetrahydrofuran-Syntheses from  $\delta,\varepsilon$ -Unsaturated Alcohols

*Bárbara Menéndez Pérez, Dominik Schuch, and Jens Hartung*

Fachbereich Chemie, Organische Chemie, Erwin-Schrödinger Straße,  
Technische Universität Kaiserslautern, D-67663 Kaiserslautern

Fax: +49 631 205 3921

E-mail: hartung@chemie.uni-kl.de

**Contents**

|    |                                                                                                       |    |
|----|-------------------------------------------------------------------------------------------------------|----|
| 1  | General Remarks.....                                                                                  | 1  |
| 2  | Instrumentation .....                                                                                 | 2  |
| 3  | Synthesis of (1 <i>R</i> ,4 <i>R</i> )-3-Acyl-1,7,7-trimethylbicyclo[2.2.1]heptan-2-ones .....        | 2  |
| 4  | Synthesis of Tetrahydrofur-2-ylcarbaldehydes.....                                                     | 5  |
| 5  | Spectral Data of Selected Oxidation Products.....                                                     | 7  |
| 6  | Quantitative Analysis of Reaction Water .....                                                         | 15 |
| 7  | Quantitative Acetone Analysis .....                                                                   | 15 |
| 8  | General Procedure for Determining Enantiomeric Purity of Substituted Tetrahydrofur-2-ylmethanols..... | 16 |
| 9  | Aerobic Oxidation of 1-Phenylpent-4-en-1-ol ( <b>9b</b> ) in 2-Propanol- <i>d</i> <sub>8</sub> .....  | 16 |
| 10 | Products of Cobalt Complex Desintegration in the Absence of Alkenols.....                             | 19 |
| 11 | References.....                                                                                       | 21 |

**1 General Remarks**

(i) The compound numbering in the electronic supporting information (ESI) is consistent with that of the accompanying publication. (ii) References refer exclusively to the ESI.

## 2 Instrumentation

Melting points [°C] were determined on a Koffler hot-plate melting point microscope (*Reichert*). <sup>1</sup>H-, <sup>13</sup>C- and <sup>19</sup>F-NMR spectra were recorded with FT-NMR DPX 200, DPX 400 and DMX 600 instruments (*Bruker*). Chemical shifts refer to the  $\delta$ -scale (coupling constants *J* are given in Hz). The resonances of residual protons and the corresponding carbons of deuterated solvents CDCl<sub>3</sub> ( $\delta_{\text{H}}$  7.26,  $\delta_{\text{C}}$  77.0) or DMSO-*d*<sub>6</sub> ( $\delta_{\text{H}}$  2.49,  $\delta_{\text{C}}$  39.5) were used as internal standards. Mass spectra (EI, 70 eV) were recorded with a Mass Selective Detector HP 6890 (*Hewlett Packard*). MALDI-TOF spectra were measured with an Ultraflex TOF/TOF (*Bruker*) using DHB as matrix. UV/Vis-spectra were recorded in 1 cm-quartz cuvettes with a Cary 100 spectrometer (*Varian*) at 20 °C using analytical grade solvents. Molar extinction coefficients ( $\epsilon$ ) are reported in m<sup>3</sup> × mol<sup>-1</sup> × cm<sup>-1</sup>. GC Analyses were performed on a HP 6890 Series (*Hewlett Packard*) with a ZB5 column (*Phenomenex*, 30 m x 0.25 mm, 0.25  $\mu$ m). Temperature program: 40 °C (3 min), linear temperature rise (10 °C min<sup>-1</sup>) to 280 °C, final temperature 280 °C (10 min). Combustion analyses were performed with an Elemental Analyser 2400 CHN (*Perkin Elmer*). Volumetric measurements of water were made on a 702 SM Titrino (*Metrohm*). IR spectra were recorded on a FT-IR 1000 spectrometer (*Perkin Elmer*). HPLC analysis: L-4250 UV/VIS detector, L-6200 A Intelligent Pump (*Merck*), Delta Bond (AK) column (*Keystone Scientific, Inc.*, 4.6 mm × 150 mm length, particle size 5  $\mu$ m, pore size 300 Å) and Delta Bond (AK) pre-concentration column (*Keystone Scientific, Inc.*, 4.0 mm × 10 mm length).

## 3 Synthesis of (1*R*,4*R*)-3-Acyl-1,7,7-trimethylbicyclo[2.2.1]heptan-2-ones

**(1*R*,4*R*)-3-[(2,2-Dimethyl-1-oxo)prop-1-yl]-1,7,7-trimethylbicyclo[2.2.1]heptan-2-one (1).** A solution of (1*R*,4*R*)-1,7,7-trimethylbicyclo[2.2.1]heptan-2-one [(+)-camphor] (10.5 g, 69.0 mmol) in DME (25 mL) was added in a dropwise manner over a period of 1 h to a refluxing solution of NaNH<sub>2</sub> (3.0 g, 69.2 mmol) in DME (40 mL) under an atmosphere of nitrogen. Heating was continued for 1 h followed by addition of a solution of pivaloyl chloride (2.5 g, 20.7 mmol) in DME (15 mL) within 5 min. The reaction mixture was boiled for further 14 h. It was then cooled to 20 °C, poured onto 50 g of crushed ice and 6 mL of conc. HCl. The pH of the mixture was adjusted with additional conc. HCl to 6–7. It was extracted with Et<sub>2</sub>O (2 × 50 mL) and the combined

organic layers were washed with H<sub>2</sub>O (5 × 20 mL), dried (MgSO<sub>4</sub>) and concentrated under reduced pressure. The remaining oil was purified by column chromatography to give product **1** (553 mg, 11 %). Red solid, mp 63.0 °C, *R*<sub>f</sub> 0.56 [SiO<sub>2</sub>, pentane/diethylether = 3:1 (v/v)]. [ $\alpha$ ]<sub>D</sub><sup>20</sup> +57.0 (*c* 0.98 in CHCl<sub>3</sub>).  $\lambda_{\text{max}}$  (MeOH)/nm 277 (lg  $\epsilon$  1.72).  $\nu_{\text{max}}$  (KBr)/cm<sup>-1</sup> 2967 and 2870 (CH), 1750 and 1690 (CO) and 1079.  $\delta_{\text{H}}$  (400 MHz; CDCl<sub>3</sub>) 0.90 (6 H, s, 2 × 7-Me), 1.00 (3 H, s, 1-Me), 1.15 (9 H, s, 3 × 12-Me), 1.37–1.79 (4 H, m, 5-H, 6-H), 2.34 (1 H, m<sub>c</sub>, 4-H) and 3.83 (1 H, dd, *J* 4.8 and 1.3, 3-H).  $\delta_{\text{C}}$  (100 MHz; CDCl<sub>3</sub>) 9.6 (1-Me), 19.0 (7-Me), 19.7 (7-Me), 21.7 (C5), 26.2 (3 × 2'-Me), 29.3 (C6), 45.1 (C2'), 46.7 (C7), 48.8 (C4), 57.9 (C3), 58.4 (C1), 212.8 (C1') and 213.7 (C2), *m/z* (EI, 70 eV) 236 (M<sup>+</sup>, 28 %), 221 (3), 208 (17), 193 (6), 179 (86), 151 (100), 137 (13), 127 (21), 123 (38), 109 (45), 83 (46) and 57 (95). Calc. for C<sub>15</sub>H<sub>24</sub>O<sub>2</sub>: C, 76.23; H, 10.23 %. Found: C, 76.49; H, 10.37 %.

**(1*R*,4*R*)-3-Trifluoroacetyl-1,7,7-trimethylbicyclo[2.2.1]heptan-2-one (2).** (1*R*,4*R*)-1,7,7-Trimethylbicyclo[2.2.1]heptan-2-one (15.2 g, 100 mmol) was added to a suspension of NaH (9.0 g, 375 mmol) in DME (150 mL). The mixture was refluxed for 1 h. A solution of ethyl trifluoroacetate (15.7 g, 110 mmol) in DME (50 mL) was added into the boiling solution in a dropwise manner within 1 h. Heating was continued for 2 h. The mixture was hereafter cooled down to 0 °C. EtOH (15 mL) was added. The deep red mixture was poured into H<sub>2</sub>O (300 mL), acidified with conc. HCl (pH 1) and extracted with pentane (4 × 100 mL). Combined organic extracts were washed with 5 % aqueous NaHCO<sub>3</sub> solution (2 × 150 mL) and H<sub>2</sub>O (150 mL), dried (MgSO<sub>4</sub>) and concentrated under reduced pressure. The remaining oil was distilled to afford compound **2** (18.2 g, 73 %). Colorless liquid, bp 62 °C / 0.25 mbar, *R*<sub>f</sub> 0.63 [SiO<sub>2</sub>, petrolether/diethylether = 5:1 (v/v)]. [ $\alpha$ ]<sub>D</sub><sup>20</sup> +150.0 (*c* 1.07 in CHCl<sub>3</sub>).  $\lambda_{\text{max}}$  (MeOH)/nm 258 (lg  $\epsilon$  0.08) and 313 (0.52).  $\nu_{\text{max}}$  (NaCl)/cm<sup>-1</sup> 2965 and 2876 (CH), 1705 and 1655 (CO), 1452, 1374, 1321, 1264, 1223, 1192, 1147, 1106, 1073, 1038, 1003, 919, 817, 808, 761 and 678.  $\delta_{\text{H}}$  (400 MHz; CDCl<sub>3</sub>) 0.87 (3 H, s, 1-Me), 1.00 (3 H, s, 7-Me), 1.04 (3 H, s, 7-Me), 1.48 (2 H, m<sub>c</sub>, 6-H), 1.75–1.84 (1 H, m, 5-H), 2.07–2.16 (1 H, m, 5-H), 2.90–2.91 (1 H, m, 4-H) and 11.48 (1 H, br s, OH).  $\delta_{\text{C}}$  (100 MHz; CDCl<sub>3</sub>) 8.4 (1-Me), 18.1 (7-Me), 20.3 (7-Me), 26.6 (C5), 30.2 (C6), 47.2 (C4), 48.9 (C7), 58.0 (C1), 117.7 (C3), 119.4 (q, *J* 273.9 Hz, CF<sub>3</sub>), 148.2 (q, *J* 37.7 Hz, C1') and 214.0 (C2).  $\delta_{\text{F}}$  (565 MHz; EtOD) –75.3; *m/z* (EI, 70 eV) 248 (M<sup>+</sup>, 100 %), 233 (47), 220 (51), 205 (42), 151 (36), 135 (32), 123 (35) and 69 (22).

**(1*R*,4*R*)-3-Benzoyl-1,7,7-trimethylbicyclo[2.2.1]heptan-2-one (3)** was prepared from a solution of methyl benzoate (4.9 g, 36.1 mmol) in DME (20 mL), (1*R*,4*R*)-1,7,7-trimethylbicyclo[2.2.1]heptan-2-one (5.0 g, 32.8 mmol) and a suspension of NaH (1.85 g, 77.1 mmol) in DME (50 mL) in extension to the procedure described for derivative **2**. Yield: 4.9 g (58 %), colorless solid, mp 97.5 °C (pentane).  $[\alpha]_{\text{D}}^{20} +270.0$  ( $c$  1.00 in  $\text{CHCl}_3$ ).  $\lambda_{\text{max}}$  (MeOH)/nm 235sh, 244 (lg  $\epsilon$  2.86) and 308 (3.00).  $\nu_{\text{max}}$  (KBr)/ $\text{cm}^{-1}$  2965 and 2868 (CH), 1750 and 1667 (CO), 1615, 1074, 1033, 824, 795, 775 and 698;  $\delta_{\text{H}}$  (600 MHz;  $\text{CDCl}_3$ ) 0.83 (3 H, s, 1-Me), 0.94 (3 H, s, 7-Me), 1.03 (3 H, s, 7-Me), 1.51–1.57 (1 H, m, 5-H), 1.58–1.84 (2 H, m, 5-H, 6-H), 2.16 (1 H, ddt,  $J_{\text{d}}$  11.2,  $J_{\text{t}}$  4.3, 6-H), 2.84 (1 H, d,  $J$  3.8, 4-H), 7.41–7.45 (3 H, m, Ph-H) and 7.64–7.69 (2 H, m, Ph-H).  $\delta_{\text{C}}$  (150 MHz;  $\text{CDCl}_3$ ) 8.9 (1-Me), 18.8 (7-Me), 20.3 (7-Me), 27.1 (C5), 30.6 (C6), 46.4 (C7), 48.4 (C4), 58.8 (C1), 115.4 (C3), 127.8, 128.3, 130.3 and 134.1 (Ph), 161.8 (C1') and 213.3 (C2) (ketoenol).  $\delta_{\text{H}}$  (600 MHz;  $\text{CDCl}_3$ ) 0.98 (3 H, s, 1-Me), 1.02 (3 H, s, 7-Me), 1.03 (3 H, s, 7-Me), 1.33–1.39 (1 H, m, 6-H), 1.58–1.84 (3 H, m, 5-H, 6-H), 2.52 (1 H, dd,  $J$ , 4.4, 4-H), 4.24 (1 H, dd,  $J$  4.7, 1.5, 3-H), 7.45–7.50 (2 H, m, Ph-H), 7.54–7.60 (2 H, m, Ph-H) and 7.90–7.94 (2 H, m, Ph-H);  $\delta_{\text{C}}$  (150 MHz;  $\text{CDCl}_3$ ) 9.6 (1-Me), 19.0 (7-Me), 19.7 (7-Me), 22.1 (C5), 28.9 (C6), 45.2 (C7), 48.6 (C4), 50.1 (C1), 57.6 (C3), 128.4, 128.7, 133.5 and 136.4 (Ph), 197.2 (C1') and 212.9 (C2) (diketone).  $m/z$  (EI, 70 eV) 256 ( $\text{M}^+$ , 32 %), 241 (7), 228 (15), 213 (15), 147 (19), 105 (100) and 77 (36).

**(1*R*,4*R*)-3-[3,5-Bis-(trifluoromethyl)benzoyl]-1,7,7-trimethylbicyclo[2.2.1]heptan-2-one (4)** was prepared from ethyl 3,5-bis(trifluoromethyl)benzoate (5.0 g, 17.5 mmol) in DME (10 mL), (1*R*,4*R*)-1,7,7-trimethylbicyclo[2.2.1]heptan-2-one (3.0 g, 19.7 mmol) and a suspension of NaH (2.0 g, 83.3 mmol) in DME (40 mL) in extension to the procedure described for derivative **2**. Yield: 3.4 g (50 %)  $R_{\text{f}}$  0.76 [ $\text{SiO}_2$ , pentane/diethylether = 12:1 ( $v/v$ )], reddish solid, mp 73.2 °C (pentane).  $[\alpha]_{\text{D}}^{20} +159.0$  ( $c$  1.03 in  $\text{CHCl}_3$ ).  $\lambda_{\text{max}}$  (MeOH)/nm 224 (lg  $\epsilon$  2.86) and 309 (2.96).  $\nu_{\text{max}}$  (KBr)/ $\text{cm}^{-1}$  2967 and 2932 (CH), 1684 and 1638 (CO), 1300, 1278, 1173, 1132, 1041, 907, 706 and 681.  $\delta_{\text{H}}$  (200 MHz;  $\text{CDCl}_3$ ) 0.84 (3 H, s, 1-Me), 0.98 (3 H, s, 7-Me), 1.05 (3 H, s, 7-Me), 1.43–1.90 (4 H, m, 5-H, 6-H), 2.13–2.30 (1 H, m, 4-H), 2.77 (1 H, d,  $J$  3.7, 3-H), 7.93 (1 H, s, Ph-H), 8.09 (2 H, s, Ph-H) and 12.34 (1 H, br s, OH).  $\delta_{\text{C}}$  (150 MHz;  $\text{CDCl}_3$ ) 8.8 (1-Me), 18.6 (7-Me), 20.4 (7-Me), 26.8 (C5), 30.5 (C6), 46.4 (C7), 48.3 (C4), 57.8 (C3), 58.9 (C1), 123.0 (q,  $J$  270.3,  $\text{CF}_3$ ), 123.6 (1  $\times$  Ph-C), 127.7 (2  $\times$  Ph-C), 132.0 (q,  $J$  33.1, 2  $\times$  Ph-C), 136.2 (1  $\times$  Ph-C), 157.6 (C1') and 213.5 (C2).  $\delta_{\text{F}}$  (565 MHz; EtOD) –68.13 and –68.15 (ketoenol) and –68.36 (diketone).  $m/z$  (EI, 70 eV) 392 ( $\text{M}^+$ , 20 %), 373 (9),

364 (17), 349 (15), 241 (100), 213 (40), 151 (8) and 123 (42). Calc. for C<sub>19</sub>H<sub>18</sub>O<sub>2</sub>F<sub>6</sub>: C, 58.17; H, 4.62 %. Found: C, 58.20; H, 4.56 %.

## 4 Synthesis of Tetrahydrofur-2-ylcarbaldehydes

**General procedure.** To a solution of tetrahydrofur-2-ylmethanol *trans*-**10a** (1.75 mmol) or *trans*-**10b** (2.99 mmol) in CH<sub>2</sub>Cl<sub>2</sub> (4 mL/mmol) was added NEt<sub>3</sub> (1 mL/mmol) and DMSO (0.7 mL/mmol) at 0 °C. Stirring at 0 °C was continued for 15 min. Afterwards, pyridine/SO<sub>3</sub> complex (3 equiv.) was added at 0 °C. The reaction mixture was stirred for 4 h at 20 °C. It was diluted with CH<sub>2</sub>Cl<sub>2</sub> (7 mL/mmol) and washed with 2 M aq. HCl, aq. satd. NaHCO<sub>3</sub> soln., and brine. The organic layer was dried with MgSO<sub>4</sub> and the volatiles were removed under reduced pressure to leave an oily residue, which was purified by column chromatography (SiO<sub>2</sub>).

**Tetrahydro-5-(1,1-dimethylethyl)fur-2-ylcarbaldehyde (12a).** Yield: 146 mg (54 %) from **10a** (276 mg, 1.75 mmol), *R*<sub>f</sub> 0.61 [SiO<sub>2</sub>, acetone/pentane = 1:8 (v/v)], colorless oil, C<sub>9</sub>H<sub>16</sub>O<sub>2</sub> (156.22). *v*<sub>max</sub> (NaCl)/cm<sup>-1</sup> 2956, 2926 and 2869 (CH), 1735 (CO), 1465, 1363 and 1074. *δ*<sub>H</sub> (600 MHz; CDCl<sub>3</sub>) 0.91 (9 H, s, Me-H), 1.67 (1 H, m<sub>c</sub>, 3-H), 1.82–1.94 (2 H, m, 3-H, 4-H), 2.10–2.17 (1 H, m, 4-H), 3.74 (1 H, dd, *J* 9.1, 6.0, 5-H), 4.25 (1 H, td, *J*<sub>t</sub> 7.6, *J*<sub>d</sub> 1.8, 2-H) and 9.65 (1 H, d, *J* 1.8, CHO); *δ*<sub>C</sub> (100 MHz; CDCl<sub>3</sub>) 25.7 (3 × Me), 26.3 (C4), 27.6 (C3), 33.9 (C1'), 83.1 (C2), 89.1 (C5), 203.3 (CHO). *m/z* (EI, 70 eV) 156 (M<sup>+</sup>, < 1 %), 127 (45), 109 (100), 83 (64), 69 (51), 67 (28), 57 (54), 55 (52).

**Tetrahydro-5-phenylfur-2-ylcarbaldehyde (12b).** Yield: 235 mg (45 %) from **10b** (533 mg, 2.99 mmol), *R*<sub>f</sub> 0.31 [SiO<sub>2</sub>, Et<sub>2</sub>O/pentane = 5:3 (v/v)], colorless oil, C<sub>11</sub>H<sub>12</sub>O<sub>2</sub> (176.21). *v*<sub>max</sub> (NaCl)/cm<sup>-1</sup> 3061, 3029, 2936, 1731, 1450, 1063, 757 and 700. *δ*<sub>H</sub> (600 MHz; CDCl<sub>3</sub>) 1.91 (1 H, m<sub>c</sub>, 3-H), 2.11 (1 H, m<sub>c</sub>, 4-H), 2.26–2.39 (2 H, m, 3-H, 4-H), 4.57 (1 H, dd, *J* 7.4, 7.2, 2-H), 5.11 (1 H, dd, *J* 7.5, 6.6, 5-H), 7.27–7.31 (1 H, m, Ph), 7.32–7.38 (4 H, m, Ph), 9.77 (1 H, s, CHO). *δ*<sub>C</sub> (150 MHz; CDCl<sub>3</sub>) 27.4 (C3), 34.3 (C4), 82.2, 83.2 (C2 and C5), 125.5, 127.6, 128.4, 141.6 (Ph), 202.7 (CHO). *m/z* (EI, 70 eV) 176 (M<sup>+</sup>, 1 %), 158 (8), 147 (90), 129 (48), 117 (12), 105 (12), 91 (100), 77 (18).

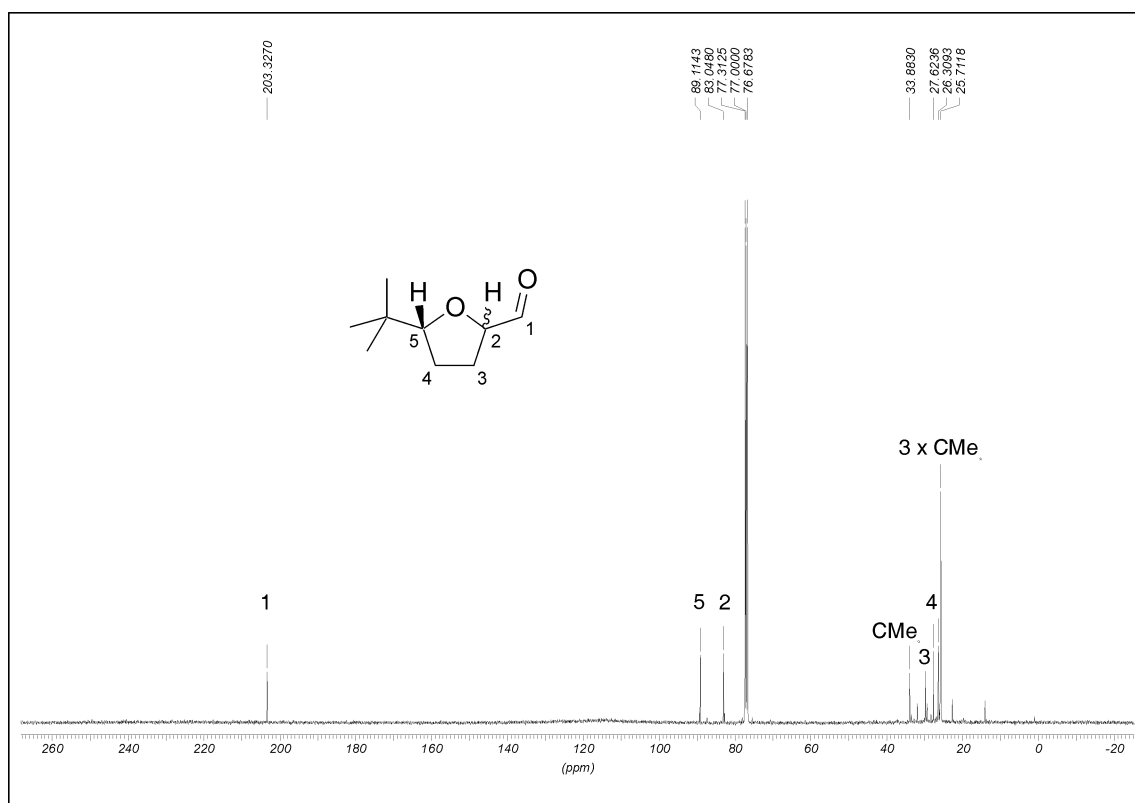

**Figure S1.**  $^{13}\text{C}$ -NMR spectrum (100 MHz) of tetrahydrofurylcarbaldehyde **12a**.

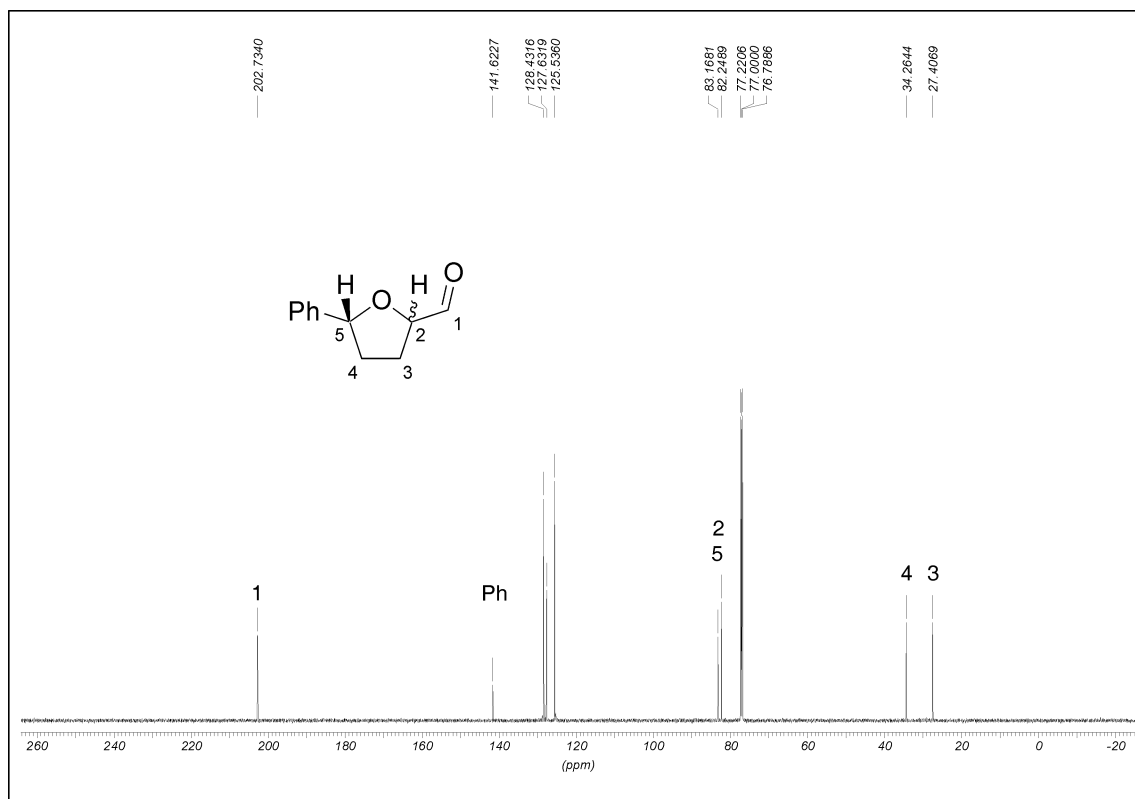

**Figure S2.**  $^{13}\text{C}$ -NMR spectrum (150 MHz) of tetrahydrofurylcarbaldehyde **12b**.

## 5 Spectral Data of Selected Oxidation Products

**1-*trans*-6-*trans*-Oxabicyclo[4.3.0]non-8-ylmethanol (10f).**<sup>1</sup> Yield: 318 mg (68 %, *cis:trans* < 1:99) from **9f** (421 mg, 3.00 mmol), *R<sub>f</sub>* 0.29 [SiO<sub>2</sub>, acetone/petroleum ether = 1:3 (v/v)], colorless oil, C<sub>9</sub>H<sub>16</sub>O<sub>2</sub> (156.22).  $\delta_{\text{H}}$  (400 MHz; CDCl<sub>3</sub>) 1.12–1.32 (3 H, m, CH<sub>2</sub>), 1.35–1.64 (5 H, m, CH<sub>2</sub>, OH), 1.71 (2 H, dd, *J* 7.7, 3.4, CH<sub>2</sub>), 1.87 (1 H, m<sub>c</sub>, CH), 2.02 (1 H, m<sub>c</sub>, CH<sub>2</sub>), 3.49 (1 H, dd, *J* 11.5, 6.5, CH<sub>2</sub>OH), 3.64 (1 H, dd, *J* 11.5, 3.2, CH<sub>2</sub>OH), 3.95 (1 H, dd, *J* 7.2, 3.4, CH), 4.25 (1 H, qd, *J<sub>q</sub>* 7.5, *J<sub>d</sub>* 3.2, CH).  $\delta_{\text{C}}$  (100 MHz; CDCl<sub>3</sub>) 20.5 (CH<sub>2</sub>), 24.0 (CH<sub>2</sub>), 27.6 (CH<sub>2</sub>), 28.1 (CH<sub>2</sub>), 34.2 (CH<sub>2</sub>), 38.3 (CH), 65.8 (CH<sub>2</sub>OH), 76.9 (CH), 77.7 (CH). *m/z* (EI, 70 eV) 155 (M<sup>+</sup>–H, 1 %), 138 (1), 125 (72), 107 (40), 81 (100), 67 (8), 55 (12), 41 (8).

**1-*cis*-6-*trans*-Oxabicyclo[4.3.0]non-8-ylmethanol (10g).**<sup>1,2</sup> Yield: 284 mg (61 %, *cis:trans* = 5:95) from **9g** (421 mg, 3.00 mmol), *R<sub>f</sub>* 0.29 [SiO<sub>2</sub>, acetone/petroleum ether = 1:3 (v/v)], colorless oil, C<sub>9</sub>H<sub>16</sub>O<sub>2</sub> (156.22).  $\delta_{\text{H}}$  (400 MHz; CDCl<sub>3</sub>) 1.07 (1 H, qd, *J<sub>q</sub>* 11.9, *J<sub>d</sub>* 3.1, CH<sub>2</sub>), 1.14–1.34 (5 H, m, CH<sub>2</sub>), 1.36–1.49 (1 H, m, CH<sub>2</sub>), 1.69 (1 H, dd, *J* 9.6, 2.7, CH<sub>2</sub>), 1.79 (1 H, m<sub>c</sub>, CH<sub>2</sub>), 1.92 (1 H, m<sub>c</sub>, CH<sub>2</sub>), 1.99 (1 H, m<sub>c</sub>, CH), 2.04 (1 H, s, OH), 3.10 (1 H, td, *J<sub>t</sub>* 10.2, *J<sub>d</sub>* 3.3, CH), 3.53 (1 H, dd, *J* 11.9, 3.1, CH<sub>2</sub>OH), 3.67 (1 H, m<sub>c</sub>, CH<sub>2</sub>OH), 4.14 (1 H, m<sub>c</sub>, CH).  $\delta_{\text{C}}$  (100 MHz; CDCl<sub>3</sub>) 24.3 (CH<sub>2</sub>), 25.6 (CH<sub>2</sub>), 29.0 (CH<sub>2</sub>), 31.3 (CH<sub>2</sub>), 33.3 (CH<sub>2</sub>), 46.0 (CH), 65.4 (CH<sub>2</sub>OH), 78.8 (CH), 82.6 (CH). *m/z* (EI, 70 eV) 155 (M<sup>+</sup>–H, 1 %), 138 (2), 125 (60), 107 (38), 81 (100), 67 (12), 55 (15), 41 (10).

**5-*tert*-Butyl-2-isopropoxy-tetrahydrofuran (13a). Isomer A:** *R<sub>f</sub>* 0.80 [SiO<sub>2</sub>, acetone/pentane = 1:8 (v/v)], colorless oil.  $\nu_{\text{max}}$  (KBr)/cm<sup>–1</sup> 3419, 2956, 2926, 2868, 1733, 1465, 1363, 1261, 1075, 1014, 986 and 802.  $\delta_{\text{H}}$  (600 MHz; CDCl<sub>3</sub>) 0.88 (9 H, s, 3 × Me), 1.13 (3 H, d, *J* 6.4, CH(CH<sub>3</sub>)<sub>2</sub>–H), 1.19 (3 H, d, *J* 6.5, CH(CH<sub>3</sub>)<sub>2</sub>–H), 1.50–1.55 (1 H, m, 4-H), 1.77–1.81 (1 H, m, 3-H), 1.83–1.87 (1 H, m, 4-H), 1.88–1.94 (1 H, m, 3-H), 3.74 (1 H, dd, *J* 7.4, 5-H), 3.88 (1 H, sept, *J* 6.4, CH(CH<sub>3</sub>)<sub>2</sub>–H), 5.22 (1 H, dd, *J* 5.3, 1.7, 2-H).  $\delta_{\text{C}}$  (150 MHz; CDCl<sub>3</sub>) 22.1 (CH(CH<sub>3</sub>)<sub>2</sub>), 23.8 (CH(CH<sub>3</sub>)<sub>2</sub>), 24.3 (C4), 25.7 (3 × Me), 32.7 (C3), 33.2 (C(CH<sub>3</sub>)<sub>3</sub>), 68.6 (CH(CH<sub>3</sub>)<sub>2</sub>), 85.1 (C5), 102.2 (C2). *m/z* (EI, 70 eV) 185 (M<sup>+</sup>–H, <1 %), 143 (1), 129 (65), 109 (21), 87 (100), 83 (12), 70 (22) and 57 (17). **Isomer B:** *R<sub>f</sub>* 0.74 [SiO<sub>2</sub>, acetone/pentane = 1:8 (v/v)], colorless oil;  $\nu_{\text{max}}$  (KBr)/cm<sup>–1</sup> 3419, 2956, 2927, 2869, 1735, 1466, 1363, 1262, 1076, 1014 and 803.  $\delta_{\text{H}}$  (600 MHz; CDCl<sub>3</sub>) 0.87 (9 H, s, 3 × Me), 1.11–1.14 (3 H, m, CH(CH<sub>3</sub>)<sub>2</sub>), 1.23 (3 H, d, *J* 6.2, CH(CH<sub>3</sub>)<sub>2</sub>–H), 1.60–1.95 (4 H, m, 3-H, 4-H), 3.94 (1 H, dd, *J* 6.1, 5-H), 4.03 (1 H,

sept,  $J$  6.2,  $\text{CH}(\text{CH}_3)_2\text{-H}$ ), 5.18 (1 H, d,  $J$  4.4, 2-H).  $\delta_{\text{C}}$  (150 MHz;  $\text{CDCl}_3$ ) 21.0 ( $\text{CH}(\text{CH}_3)_2$ ), 23.5 ( $\text{CH}(\text{CH}_3)_2$ ), 24.5 (C4), 26.0 ( $3 \times \text{Me}$ ), 33.3 (C3), 33.7 ( $\text{C}(\text{CH}_3)_3$ ), 67.3 ( $\text{CH}(\text{CH}_3)_2$ ), 89.4 (C5), 100.5 (C2).  $m/z$  (EI, 70 eV) 143 ( $\text{M}^+ - \text{CH}(\text{CH}_3)_2$ , 1 %), 129 (45), 109 (43), 87 (100), 83 (25), 70 (29) and 57 (38).

**2-Phenylhexane-2,5-diol (18).**<sup>3</sup> Yield: 153 mg (39 %,  $dr = 50:50$ ) from **9e** (357 mg, 2.03 mmol),  $R_f$  0.42 [ $\text{SiO}_2$ ,  $\text{Et}_2\text{O}$ ], colorless oil,  $\text{C}_{12}\text{H}_{18}\text{O}_2$  (194.27).  $\delta_{\text{H}}$  (400 MHz;  $\text{CDCl}_3$ ) 1.13 (3 H, d,  $J$  6.2, 6-H), 1.15 (3 H, d,  $J$  6.2, 6-H), 1.28–1.53 ( $2 \times 2$  H, m, 4-H), 1.56 (3 H, s, 1-H), 1.57 (3 H, s, 1-H), 1.83–2.06 ( $2 \times 2$  H, m, 3-H), 3.78 ( $2 \times 1$  H, m, 5-H), 7.20–7.27 ( $2 \times 1$  H, m, Ph), 7.30–7.38 ( $2 \times 2$  H, m, Ph), 7.40–7.46 ( $2 \times 2$  H, m, Ph).  $\delta_{\text{C}}$  (150 MHz;  $\text{CDCl}_3$ ) 23.3 and 23.7 (C6), 30.3 and 31.0 (C1), 33.3 and 33.4 (C4), 39.8 and 40.6 (C3), 67.9 and 68.6 (C5), 74.3 (C2), 124.7 and 124.8, 126.3 and 126.4, 128.1, 147.8 and 148.0 (Ph).  $m/z$  (EI, 70 eV) 194 ( $\text{M}^+$ , 1 %), 179 (2), 161 (9), 121 (100), 117 (10), 105 (39), 91 (9), 77 (17).

**5-Methyl-1-phenyl-hexane-1,5-diol (21).**<sup>4</sup> Yield: 58.0 mg (18 %) from **9j** (295 mg, 1.55 mmol),  $R_f$  0.29 [ $\text{SiO}_2$ , acetone/pentane = 1:3 ( $v/v$ )], colorless oil,  $\text{C}_{13}\text{H}_{20}\text{O}_2$  (208.30).  $\delta_{\text{H}}$  (400 MHz;  $\text{CDCl}_3$ ) 1.19 ( $2 \times 3$  H, s, Me), 1.31–1.88 (6 H, m, 2-H, 3-H, 4-H), 4.69 (1 H, dd,  $J$  7.8, 5.4, 1-H), 7.24–7.30 (1 H, m, Ph), 7.31–7.38 (4 H, m, Ph).  $\delta_{\text{C}}$  (100 MHz;  $\text{CDCl}_3$ ) 20.6 (C3), 29.1 and 29.3 (Me), 39.5, 43.5 (C2 and C4), 71.1 (C5), 74.4 (C1), 125.8, 127.5, 128.4, 144.9 (Ph).  $m/z$  (EI, 70 eV) 190 ( $\text{M}^+ - \text{H}_2\text{O}$ , 7 %), 175 (7), 147 (6), 133 (13), 117 (36), 107 (100), 104 (53), 91 (15), 79 (48), 77 (38), 59 (33), 56 (36).



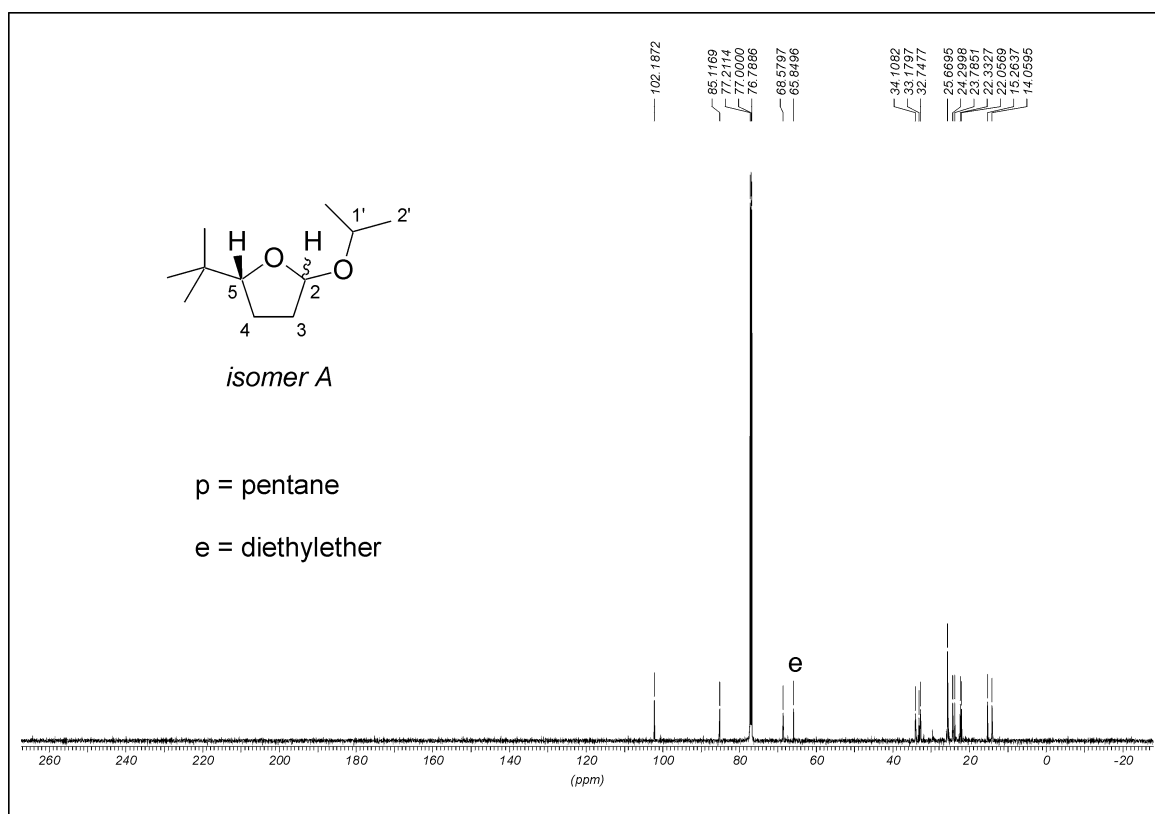

**Figure S3.**  $^{13}\text{C}$ -NMR spectrum (150 MHz) of tetrahydrofuran **13a** (isomer A).

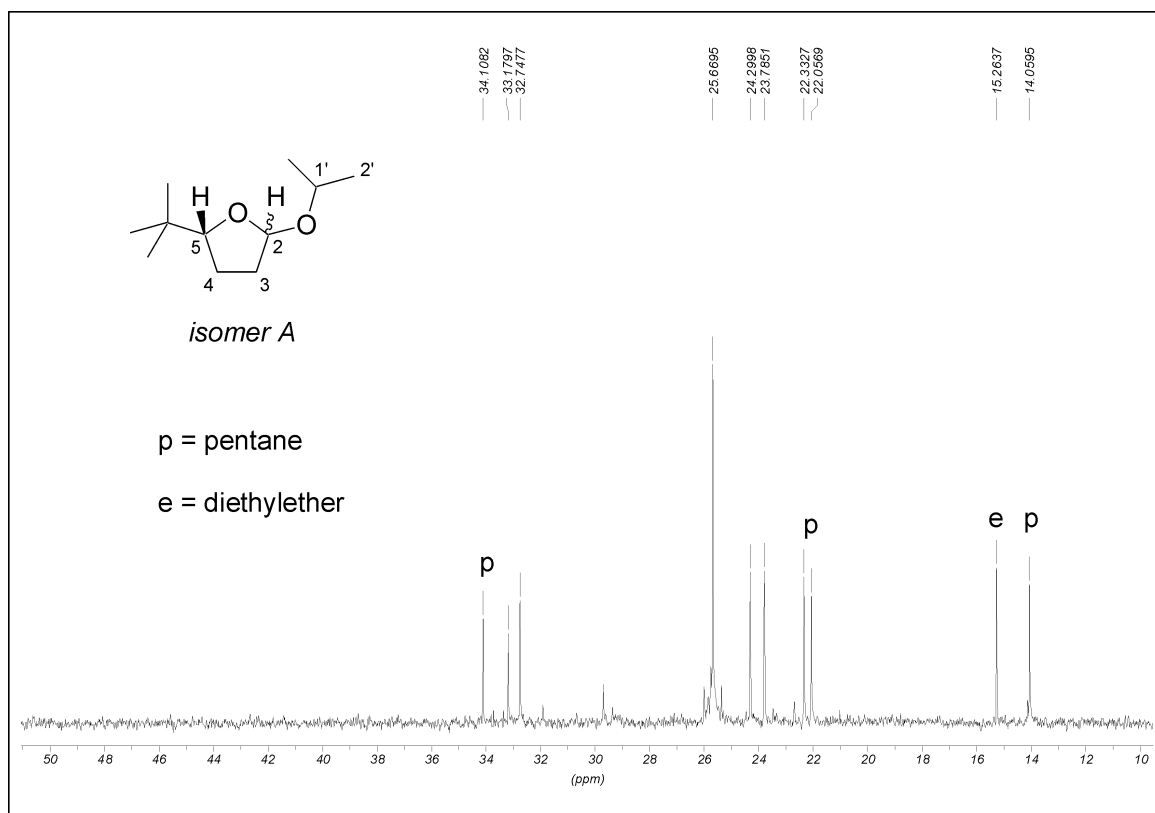

**Figure S4.** Zoom into the  $^{13}\text{C}$ -NMR spectrum (150 MHz) of tetrahydrofuran **13a** (isomer A).

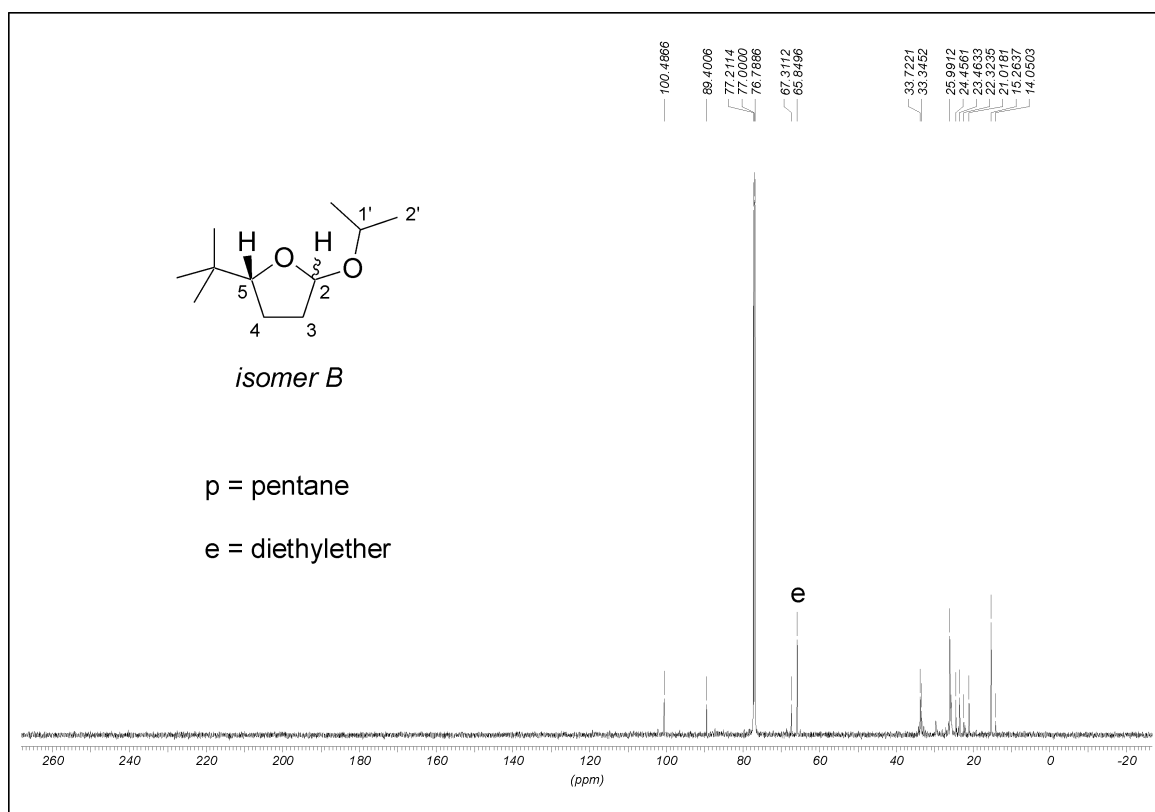

**Figure S5.**  $^{13}\text{C}$ -NMR spectrum (150 MHz) of tetrahydrofuran **13a** (isomer B).

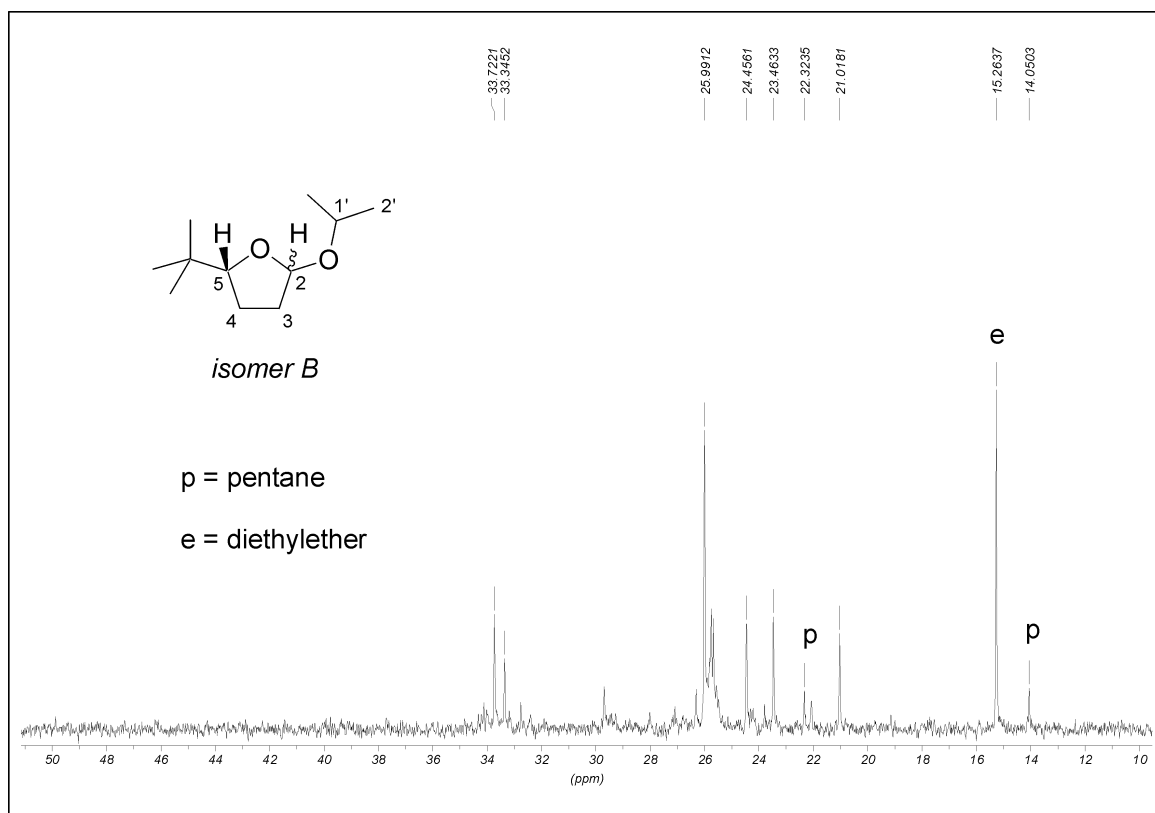

**Figure S6.** Zomm into the  $^{13}\text{C}$ -NMR spectrum (150 MHz) of tetrahydrofuran **13a** (isomer B).

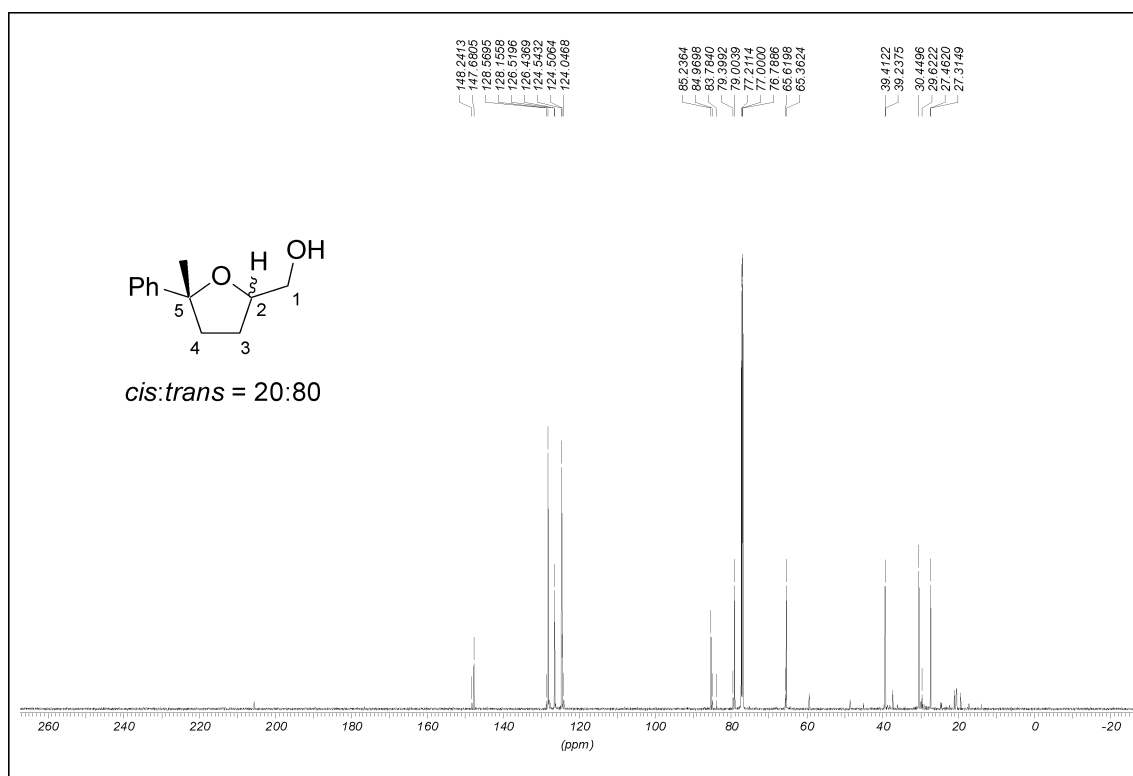

**Figure S7.**  $^{13}\text{C}$ -NMR spectrum (150 MHz) of tetrahydrofurylmethanol **10e**.

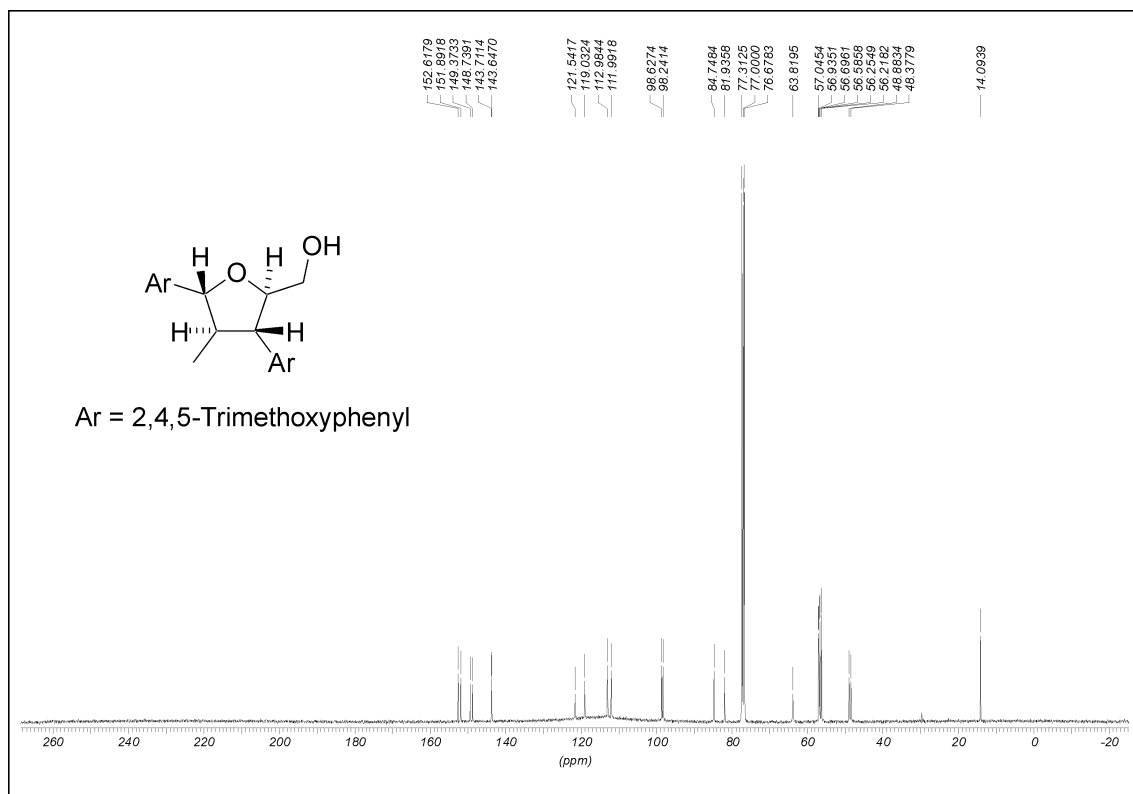

**Figure S8.**  $^{13}\text{C}$ -NMR spectrum (100 MHz) of tetrahydrofurylmethanol **10h**.

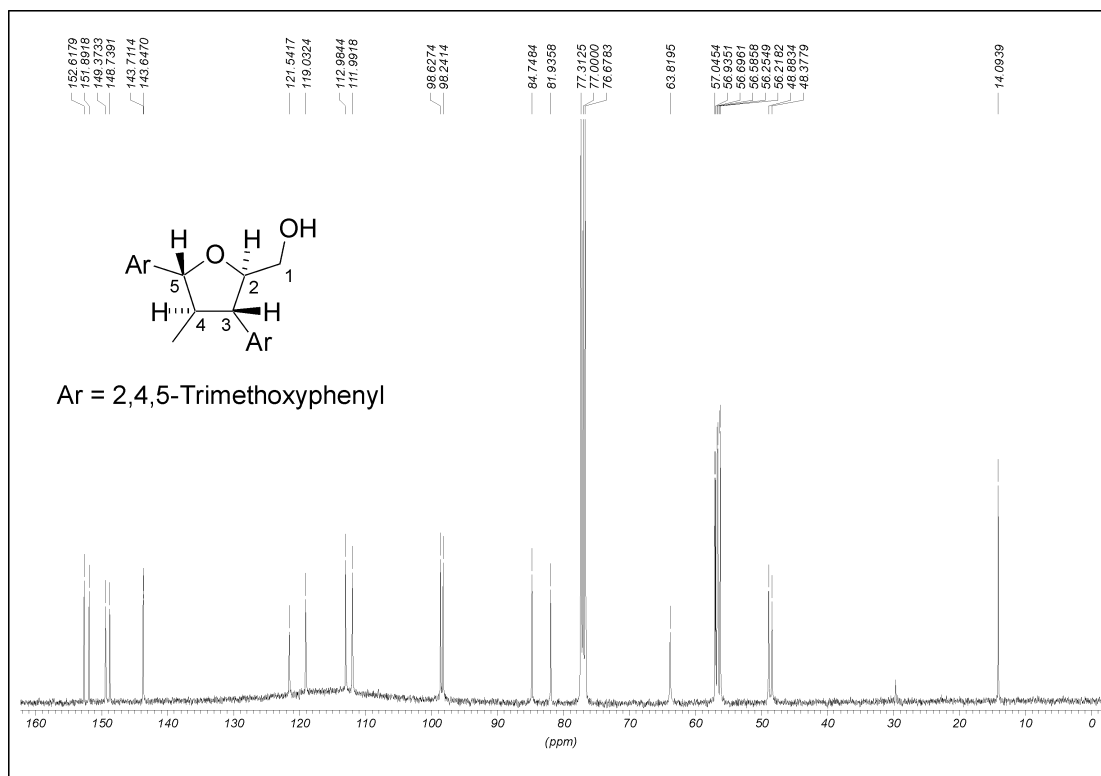

**Figure S9.** Zoom into the  $^{13}\text{C}$ -NMR spectrum (100 MHz) of tetrahydrofuran **10h**.

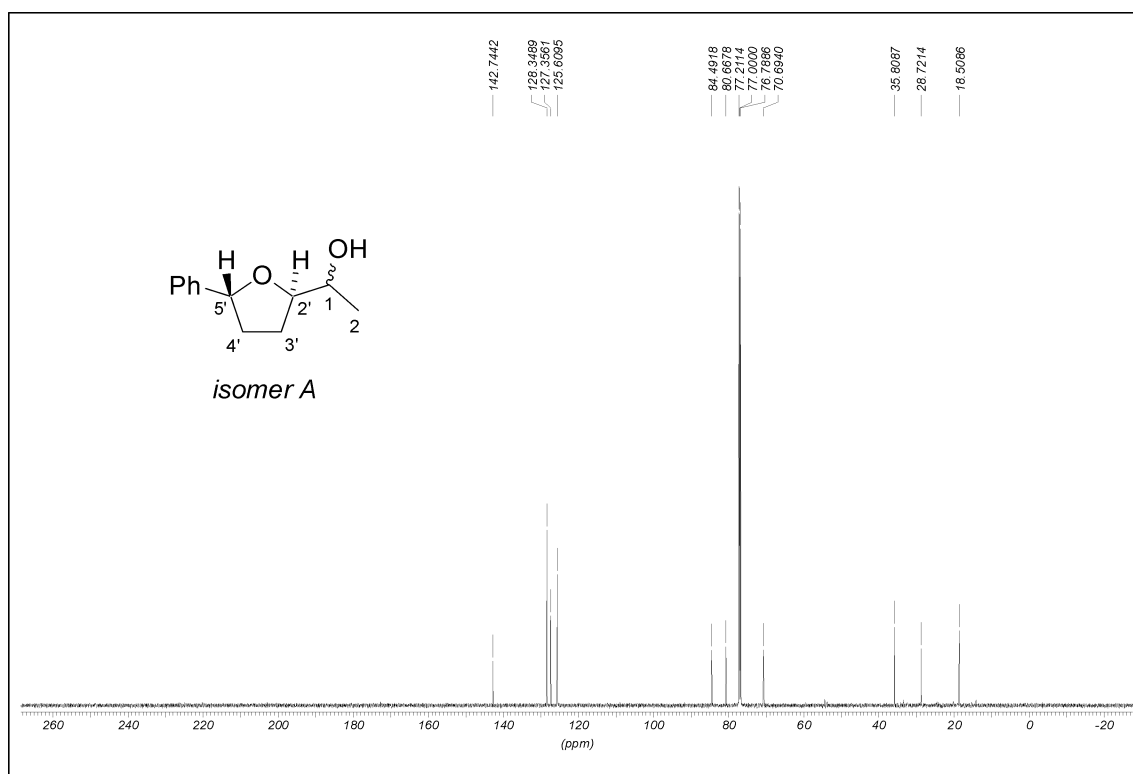

**Figure S10.**  $^{13}\text{C}$ -NMR spectrum (150 MHz) of tetrahydrofuran *trans*-**10i** (isomer A).

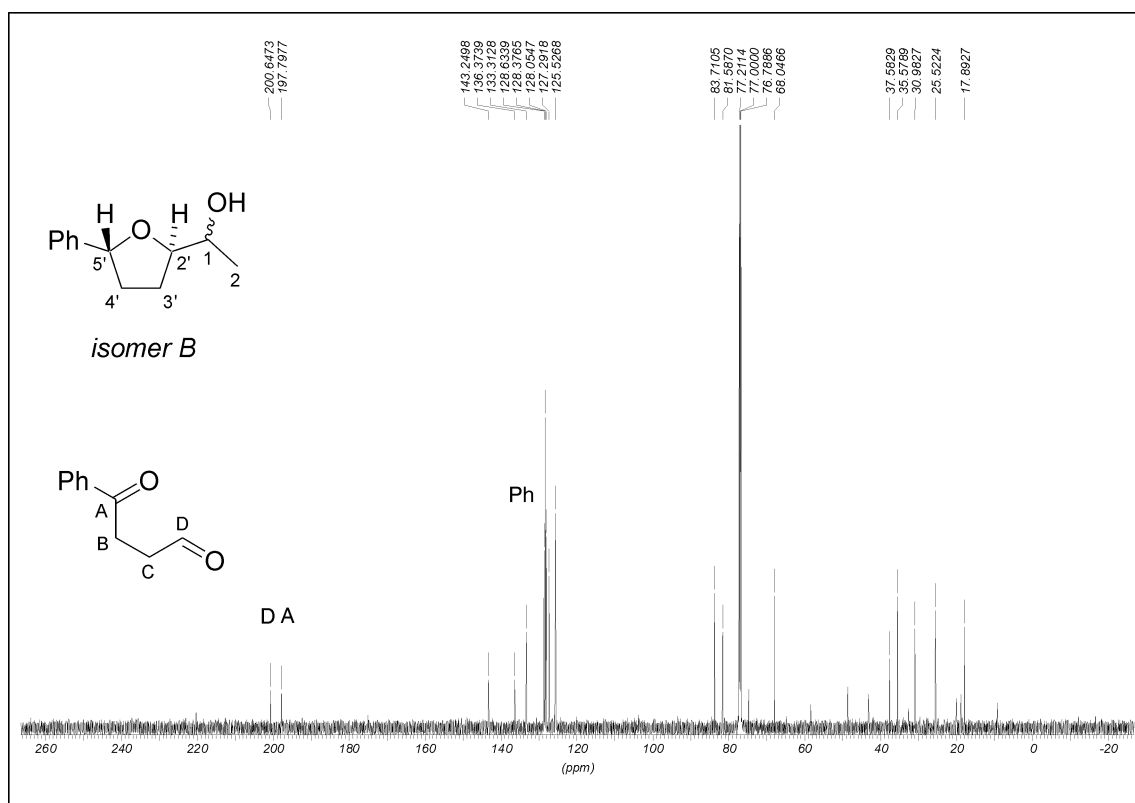

**Figure S11.**  $^{13}\text{C}$ -NMR spectrum (150 MHz) of tetrahydrofuran *trans*-10i (isomer B).

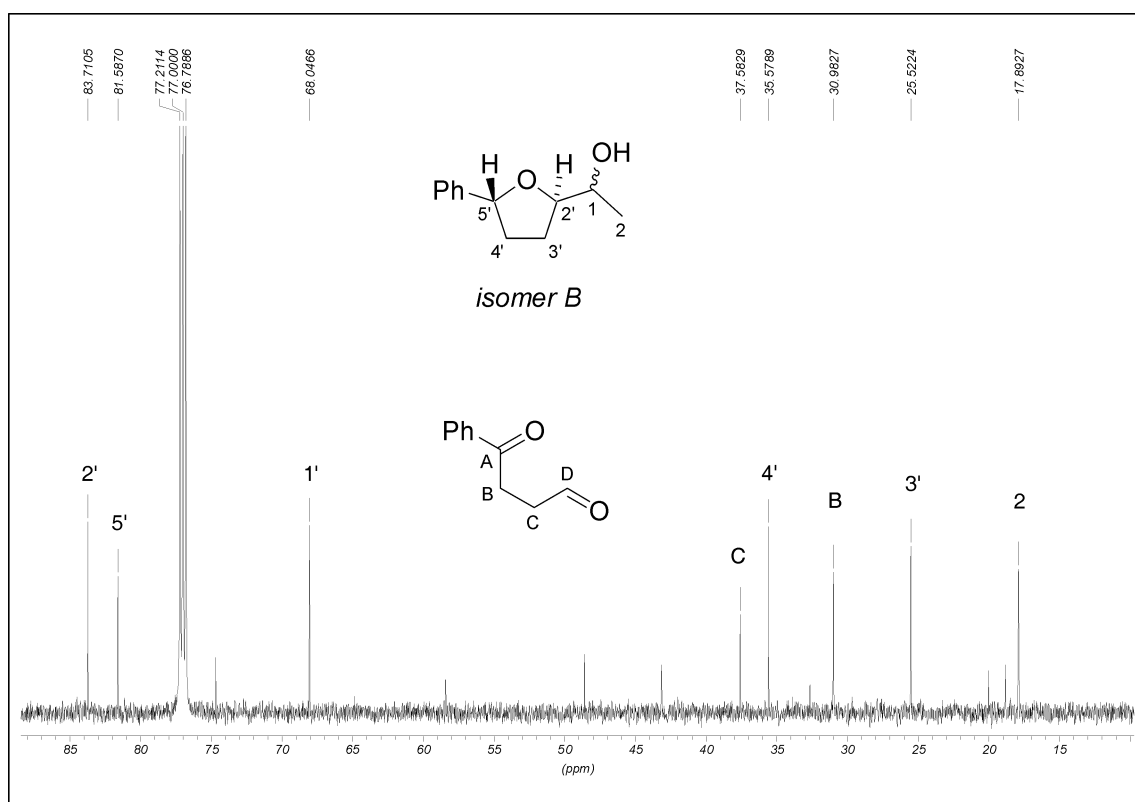

**Figure S12.** Zoom into the  $^{13}\text{C}$ -NMR spectrum (150 MHz) of tetrahydrofuran *trans*-10i (isomer B).

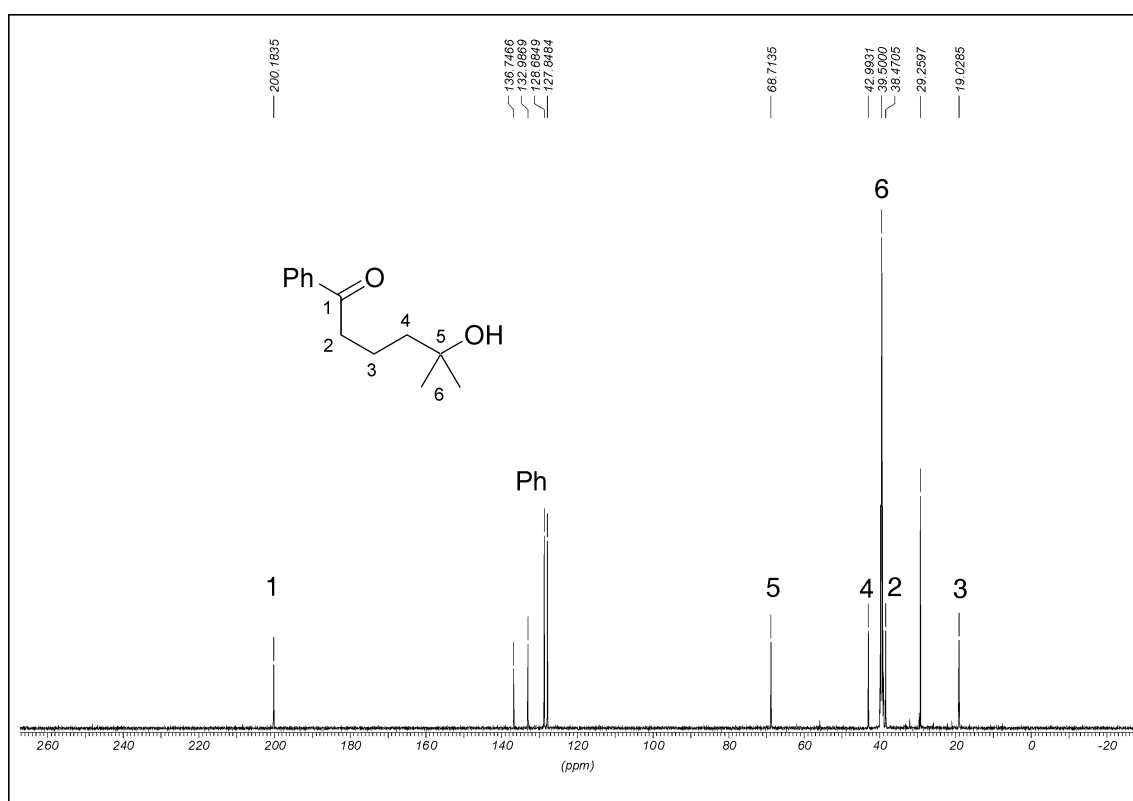

**Figure S13.**  $^{13}\text{C}$ -NMR spectrum (100 MHz) of hydroxyketone **22**.

## 6 Quantitative Analysis of Reaction Water

**6.1 General remarks.** Hydranal<sup>®</sup> reagents for the volumetric Karl Fischer titration were purchased from Riedel-deHaën. Hydranal<sup>®</sup> Composite 1 Karl Fischer reagent was used as titrating reagent. Methanol-free solution Hydranal<sup>®</sup> CompoSolver E was used as working medium in the titration cell.

**6.2 General procedure.** A Schlenk-type flask was charged with a solution of alkenol **9a** (142.2 mg, 1 mmol) or **9b** (162.2 mg, 1 mmol) and complex **6** (55.3 mg, 0.10 mmol) in *i*PrOH (8 mL). The solution was stirred for 2.5–3 hours under 3 or 1.5 bar of O<sub>2</sub> at 60 °C. The solutions were immediately cooled to 20 °C (*solution A*). Identical reactions were performed in the absence of alkenols **9a–b** (*solution B*) for correcting H<sub>2</sub>O-values associated with the oxidative cyclization to those from background H<sub>2</sub>O levels.

The following sequence of titrations was performed to determine reaction water originated from oxidative cyclizations: (i) Titer determination was performed using Apura<sup>®</sup> H<sub>2</sub>O standard (5 mg mL<sup>-1</sup>, 1 mL) (ii) H<sub>2</sub>O content of the solvent (2-propanol, 2 mL) was quantified, (iii) H<sub>2</sub>O content of a solution of **9a** or **9b** in 2-propanol (2 mL) was determined (iii) H<sub>2</sub>O content of *solution B* (1 mL) was checked, and finally (iv) the H<sub>2</sub>O level of *solution A* (1 mL) was determined. All samples were measured twice.

## 7 Quantitative Acetone Analysis

**7.1 General remarks.** Acetone was determined using the 2,4-dinitrophenylhydrazine (DNPH) derivatization method. All blanks and samples were prepared according to a modified literature procedure.<sup>5</sup> In a typical run, an aliquot (100 µL) of the solution to analyze was added to a solution of 2,4-dinitrophenylhydrazine ( $3.28 \times 10^{-3}$  M) and 5 drops of 1 M perchloric acid in CH<sub>3</sub>CN (total volume of 25 mL). The solution was vigorously agitated and then allowed to rest for 30 min at 20 °C. The retrieval rate of acetone under such conditions was 98 % ± 4 %, as determined in an independent study.

**7.2 HPLC Analysis.** The eluent was formed from (A) CH<sub>3</sub>CN p.a. and (B) distilled water using the following program: 30 % (A) to 55 % (A) in 11 min, isocratic at 55 % (A) for 4 min, 55 % (A) to 70 % (A) in 1 min, isocratic at 70 % (A) for 9 min, 70 % (A) to 30 % (A) in 1 min and isocratic at 30 % (A) for 9 min. A flow rate of 1.5 mL min<sup>-1</sup> was applied. The column (Delta Bond (AK), *Keystone Scientific, Inc.*, 4.6 mm × 150 mm length, particle size 5 µm, pore size 300 Å) and the pre-concentration column (Delta Bond (AK), *Keystone Scientific, Inc.*, 4.0 mm × 10 mm length) were kept at

22–24 °C. Injection volumes were set to 20 µl. Detection was achieved using an L-4250 (Merck) UV/Vis absorption detector operating at 365 nm.

The following solutions were analyzed for the determination of acetone originated from oxidative cyclizations: (i) acetone 2,4-dinitrophenylhydrazone as standard (ii) solvent (2-propanol), (iii) solution of **9a** or **9b** in 2-propanol and (iii) *solution B* (see 6.2) as blanks, and finally (iv) *solution A* (see 6.2).

## 8 General Procedure for Determining Enantiomeric Purity of Substituted Tetrahydrofuran-2-ylmethanol

Triethylamine (~ 1 mmol) was added in an atmosphere of N<sub>2</sub> to a solution of 2-chloro-(4*R*,5*R*)-bis-(ethyloxycarbonyl)-1,3,2-dioxaphospholane (~ 1 mmol) in anhydrous THF (4 mL).<sup>6</sup> The mixture was stirred for 15 min at 20 °C. Neat tetrahydrofurylmethanol **10** (250–500 µmol) was added and stirring of the mixture was continued for 5 min. The solids were removed by filtration and the solution (300 µl) was transferred via syringe into a NMR tube. CDCl<sub>3</sub> (100 µl) was added and the sample was analyzed by <sup>31</sup>P-NMR spectroscopy (242.9 MHz).

## 9 Aerobic Oxidation of 1-Phenylpent-4-en-1-ol (**9b**) in 2-Propanol-*d*<sub>8</sub>

Alkenol **9b** (164.4 mg, 1.01 mmol) and cobalt(II) complex **6** (56.5 mg, 102 µmol, 0.10 equivalents) were dissolved in 2-propanol-*d*<sub>8</sub> (6 mL) and stirred for 2 h at 75 °C in an atmosphere of O<sub>2</sub>/N<sub>2</sub> = 1/1 (v/v). The reaction mixture was worked up as described in the general procedure in the associated manuscript. **5-Methyl-2-phenyltetrahydrofuran (11b)**. Yield: 29.7 mg (18 %, deuteration grade 50 %), *R*<sub>f</sub> 0.52 [SiO<sub>2</sub>, Et<sub>2</sub>O/pentane = 1/6 (v/v)], colorless oil, C<sub>11</sub>H<sub>14</sub>O (162.23) and C<sub>11</sub>H<sub>13</sub>DO (163.23). δ<sub>H</sub> (600 MHz, CDCl<sub>3</sub>) 1.30 (1 H, dd, *J* 6.1, 1.9, CH<sub>2</sub>D), 1.31 (1 H, dd, *J* 6.1, 1.9, CH<sub>2</sub>D), 1.32 (3 H, d, *J* 6.1, Me), 1.62 (2 × 1 H, ddt, *J*<sub>d</sub> 12.1, 10.0, *J*<sub>t</sub> 7.8, 4-H), 1.88 (2 × 1 H, ddt, *J*<sub>d</sub> 12.3, 10.0, *J*<sub>t</sub> 7.9, 4-H), 2.16 (2 × 1 H, m<sub>c</sub>, 3-H), 2.39 (2 × 1 H, m<sub>c</sub>, 3-H), 4.32–4.39 (2 × 1 H, m, 5-H), 5.04 (2 × 1 H, dd, *J* 8.1, 6.6, 2-H), 7.22–7.26 (2 × 1 H, m, Ph), 7.30–7.36 (2 × 4 H, m, Ph). δ<sub>C</sub> (150 MHz, CDCl<sub>3</sub>) 21.2 (t, CH<sub>2</sub>D), 21.5 (Me), 34.2 and 34.3 (C4), 35.6 (C3), 2 × 75.9 (C5), 80.2 (C2), 125.5, 127.0, 128.3, 144.0 (Ph); *m/z* (EI, 70 eV) 163 (46) and 162 (M<sup>+</sup>, 69 %), 147 (8), 129 (7), 117 (59), 105 (100), 91 (41), 77 (48), 56 (37).



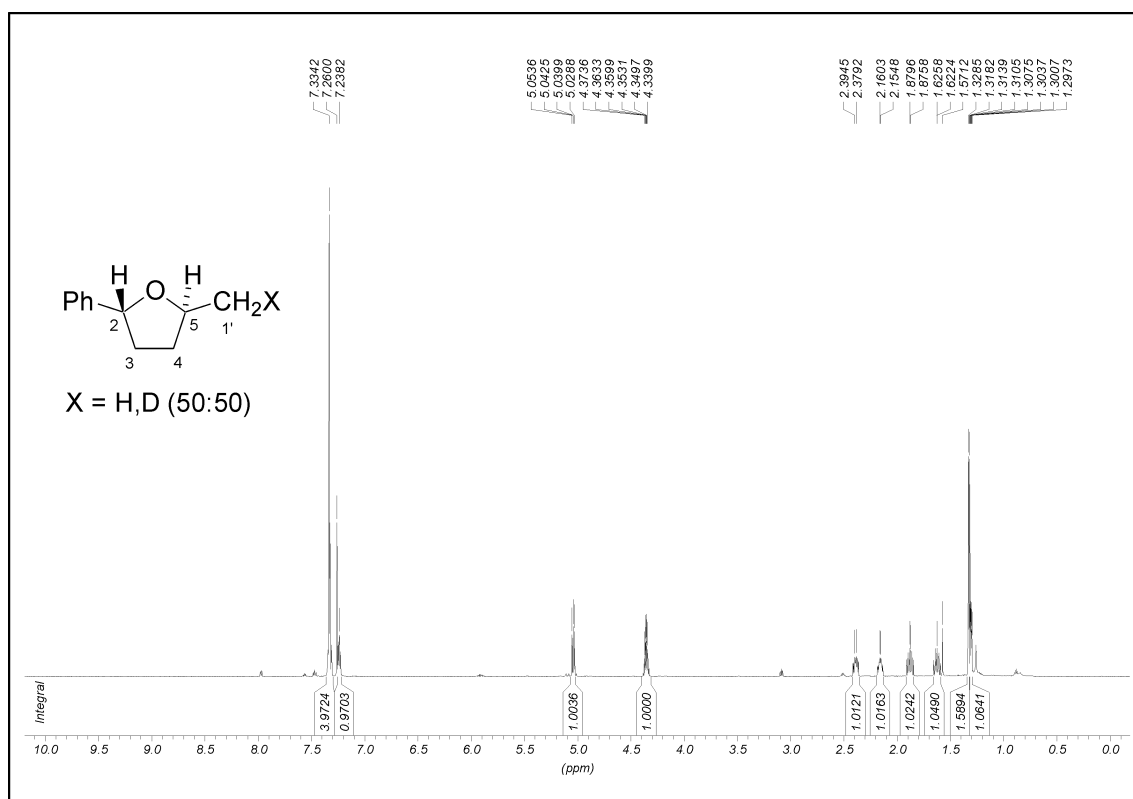

**Figure S14.**  $^1\text{H}$ -NMR spectrum (600 MHz) of tetrahydrofuran **11b** obtained from aerobic oxidation of alkenol **9b** in 2-propanol- $d_8$ .

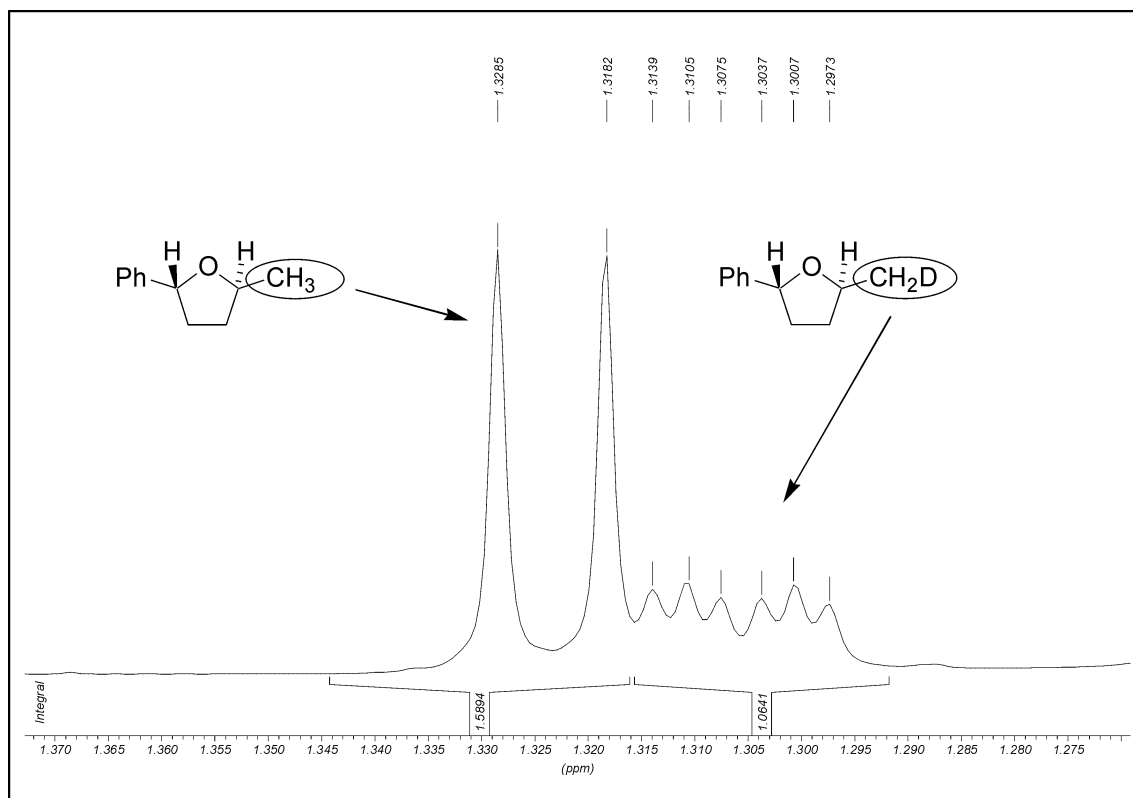

**Figure S15.**  $^1\text{H}$ -NMR spectrum (600 MHz) of tetrahydrofuran **11b** obtained from aerobic oxidation of alkenol **9b** in 2-propanol- $d_8$  showing part of the aliphatic region.

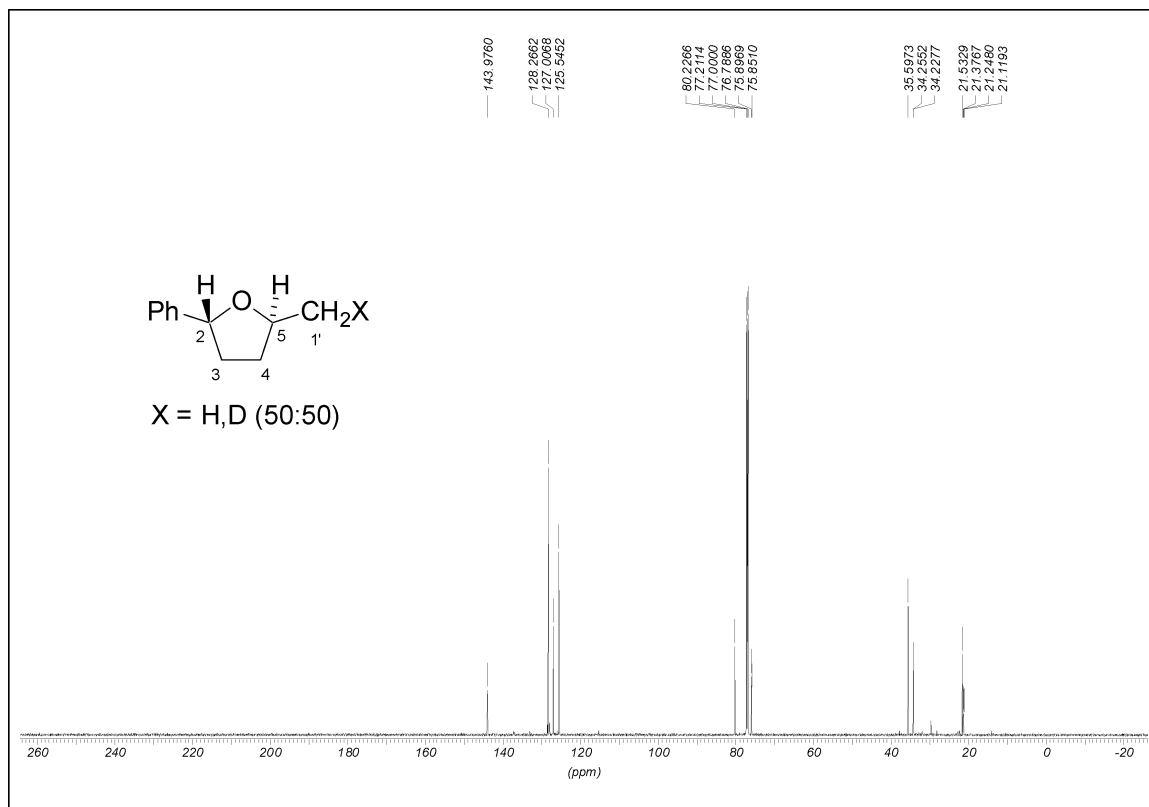

**Figure S16.**  $^{13}\text{C}$ -NMR spectrum (150 MHz) of tetrahydrofuran **11b** obtained from aerobic oxidation of alkenol **9b** in 2-propanol- $d_8$ .

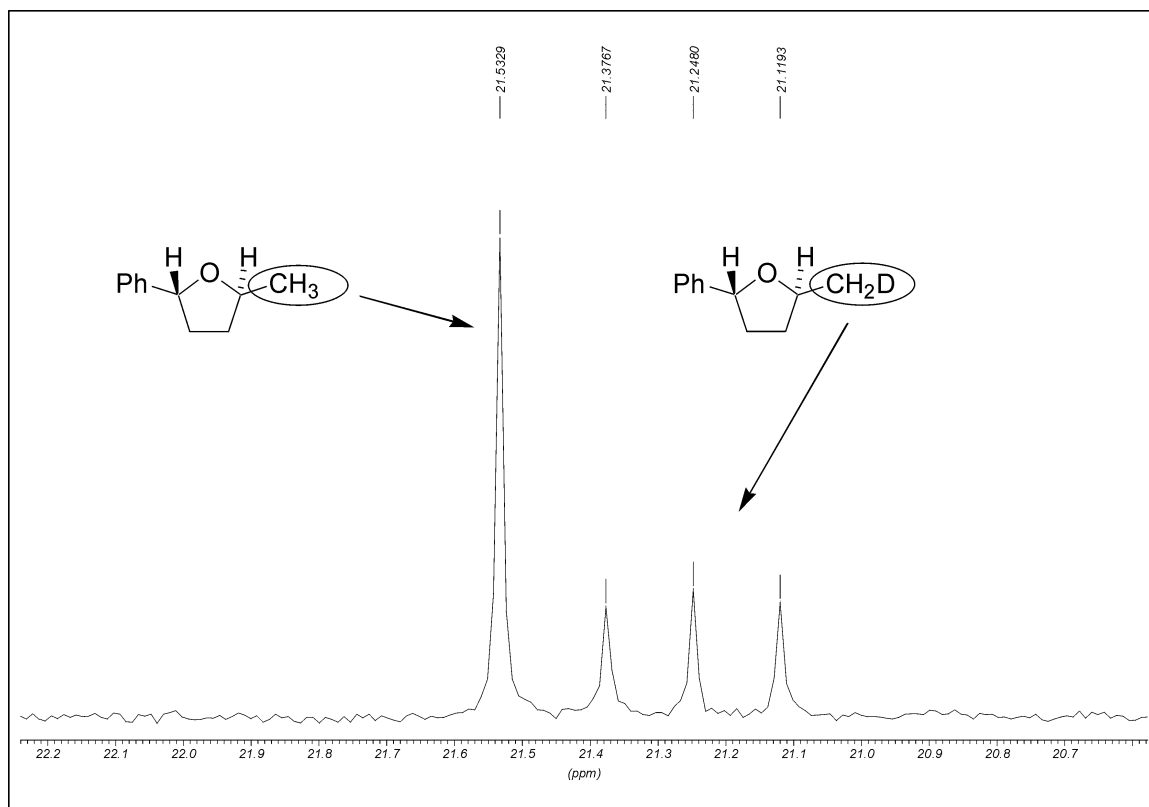

**Figure S17.**  $^{13}\text{C}$ -NMR spectrum (150 MHz) of tetrahydrofuran **11b** obtained from aerobic oxidation of alkenol **9b** in 2-propanol- $d_8$  showing part of the aliphatic region.

## 10 Products of Cobalt Complex Desintegration in the Absence of Alkenols

2-Propanol (10 mL) was purged with a stream of N<sub>2</sub>. Complex **6** (552.0 mg, 1 mmol) was dissolved into the deaerated solvent. The solution was allowed to stir at 22 °C in an O<sub>2</sub>-atmosphere provided by a burette. After 138 h 3.21 mmol O<sub>2</sub> were taken up. The solution was analyzed as described in chapters 6 and 7 to give 3.21 mmol acetone and 3.20 mmol H<sub>2</sub>O. The remaining solution was worked up according to the general procedure for cobalt-catalyzed oxidations described in the associated manuscript. The residual oil was purified by column chromatography [SiO<sub>2</sub>, acetone/pentane = 1:8 (v/v)] to give 4-isopropoxy-1,8,8-trimethyl-3-oxa-bicyclo[3.2.1]octan-2-one (84.5 mg, 0.37 mmol) and 3-oxa-1,8,8-trimethylbicyclo[3.2.1]octane-2,4-dione<sup>7</sup> (15.0 mg, 0.08 mmol). A control experiment indicated no volumetric change in the O<sub>2</sub> burette upon stirring of similarly deaerated 2-propanol over a period of 72 h at 22 °C.

**4-Isopropoxy-1,8,8-trimethyl-3-oxa-bicyclo[3.2.1]octan-2-one.** Yield: 84.5 mg (0.37 mmol, *dr* = 50:50) from **6** (552.0 mg, 1.00 mmol), *R*<sub>f</sub> 0.53 [SiO<sub>2</sub>, acetone/pentane = 1:8 (v/v)], colorless solid, C<sub>13</sub>H<sub>22</sub>O<sub>3</sub> (226.31). δ<sub>H</sub> (600 MHz; CDCl<sub>3</sub>) 0.91 (3 H, s, Me), 0.95 (3 H, s, Me), 1.07 (3 H, s, Me), 1.12–1.17 (2 × 3 H, m, OCH-Me), 1.14 (3 H, s, Me), 1.15 (3 H, s, Me), 1.16 (3 H, s, Me), 1.21 (3 H, d, *J* 6.2, OCH-Me), 1.24 (3 H, d, *J* 6.2, OCH-Me), 1.52–2.29 (2 × 5 H, m, 5-H, 6-H, 7-H), 4.03 (1 H, sept, *J* 6.2, OCH), 4.10 (1 H, sept, *J* 6.2, OCH), 5.15 (1 H, s, 4-H), 5.41 (1 H, d, *J* 2.9, 4-H), δ<sub>C</sub> (150 MHz; CDCl<sub>3</sub>) 14.1 (Me), 18.8 (CH<sub>2</sub>), 19.6, 21.2, 21.3, 21.6, 22.6, 23.3, 23.5 (7 × Me), 25.2 (CH<sub>2</sub>), 25.7 (2 × Me), 34.4, 34.9 (2 × CH<sub>2</sub>), 42.3 and 42.9 (C8), 48.7 and 49.7 (C5), 52.5 and 53.3 (C1), 70.7 and 70.9 (OCH), 100.9 and 105.8 (C4), 176.4 and 176.7 (C2). *m/z* (EI, 70 eV) 225 (M<sup>+</sup>–H, 1 %), 138 (8), 122 (20), 109 (6), 99 (41), 95 (24), 69 (21), 57 (100).

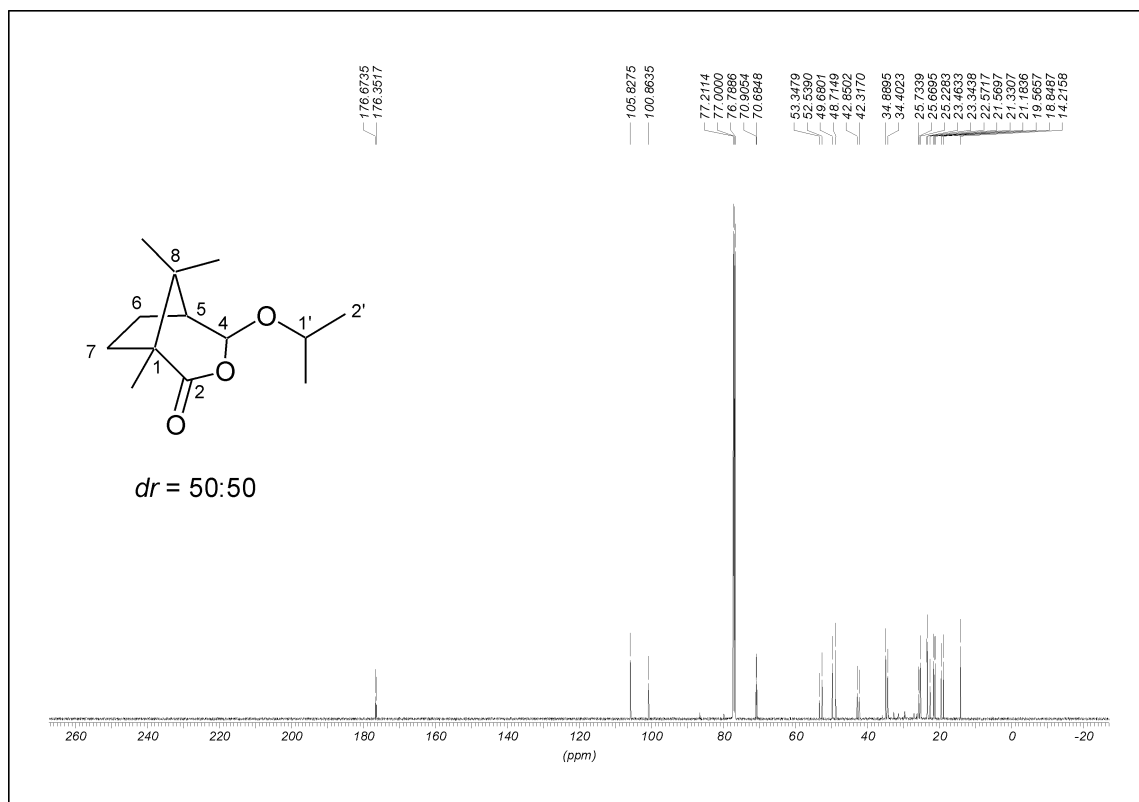

**Figure S18.** <sup>13</sup>C-NMR spectrum (150 MHz) 4-Isopropoxy-1,8,8-trimethyl-3-oxa-bicyclo[3.2.1]octan-2-one.

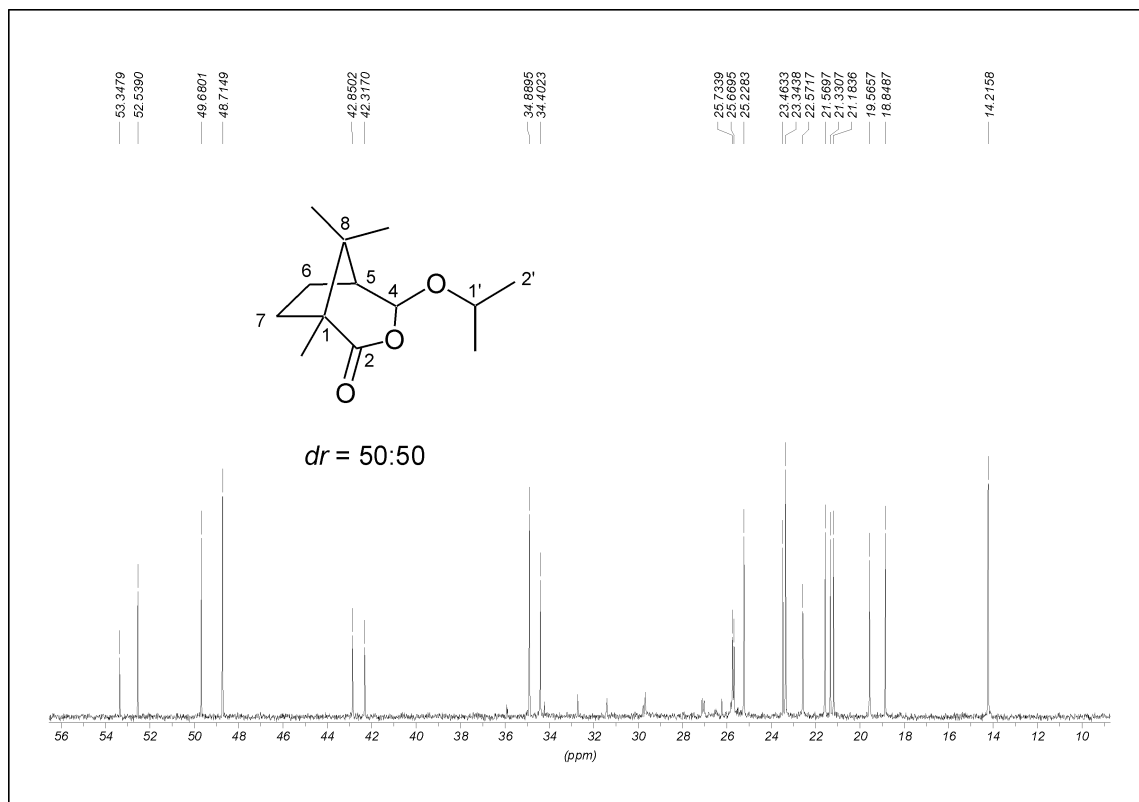

**Figure S19.** Zoom into the <sup>13</sup>C-NMR spectrum (150 MHz) 4-Isopropoxy-1,8,8-trimethyl-3-oxa-bicyclo[3.2.1]octan-2-one.

## 11 References

- 1 S. Tang, R. M. Kennedy, *Tetrahedron Lett.*, 1992, **33**, 5299–5302.
- 2 M.-C. Benhamou, G. Etemad-Moghadam, V. Spéziale, A. Lattes, *J. Heterocycl. Chem.*, 1978, **15**, 1313–1318.
- 3 J. L. Princival, S. M. G. de Barros, J. V. Comasseto, A. A. Dos Santos, *Tetrahedron Lett.*, 2005, **46**, 4423–4425.
- 4 F. Foubelo, S. A. Saleh, M Yus, *J. Org. Chem.*, 2000, **65**, 3478–3483.
- 5 F. Lipari, S. J. Swarin, *J. Chrom.* 1982, **247**, 297–306.
- 6 J.-M. Brunel, O. Pardigon, M. Maffei, G. Buono, *Tetrahedron: Asymmetry*, 1992, **3**, 1243–1246.
- 7 M. G. Moloney, D. R. Paul, R. M. Thompson, E. Wright *Tetrahedron: Asymmetry*, 1996, **7**, 2551–2562.
